# Supplementary material for: Significant Influence of UV-vis Irradiation on Cloud Activation Efficiencies of Ammonium Sulfate Aerosols under Simulated Chamber Conditions
Source: Copernicus journal article supplement (doi:10.5194/amt-2023-206), 2024-03-08
Supplement: Supplementary file 1 [file amt-2023-206-supplement.pdf]

# Supplementary Information

## Significant Influence of UV-vis Irradiation on Cloud

### Activation Efficiencies of Ammonium Sulfate Aerosols under Simulated Chamber Conditions

Anil Kumar Mandariya<sup>1</sup>, Junteng Wu<sup>2, +</sup>, Anne Monod<sup>2</sup>, Paola Formenti<sup>3</sup>, Bénédicte Picquet-Varrault<sup>1</sup>, Mathieu Cazaunau<sup>1</sup>, Stephan Mertes<sup>4</sup>, Laurent Poulain<sup>4</sup>, Antonin Berge<sup>3</sup>, Edouard Pangui<sup>1</sup>, Andreas Tilgner<sup>4</sup>, Thomas Schaefer<sup>4</sup>, Liang Wen<sup>4, ++</sup>, Hartmut Herrmann<sup>4</sup>, and Jean-François Doussin<sup>1</sup>

<sup>1</sup> Univ Paris Est Creteil and Université Paris Cité, CNRS, LISA, F-94010 Créteil, France

<sup>2</sup> Aix Marseille Université, CNRS, LCE, Marseille, France

<sup>3</sup> Université Paris Cité and Univ Paris Est Creteil, CNRS, LISA, F-94010 Créteil, France

<sup>4</sup> Leibniz Institute for Tropospheric Research, Leipzig (TROPOS), 04318, Germany

+ : now: at Laboratoire de Météorologie Physique, UMR 6016, CNRS, Université Clermont Auvergne, 63178 Aubière, France

++ : now: at Chinese Research Academy of Environmental Sciences (CRAES), Beijing 100012, China

*Correspondence to:* Jean-François Doussin (Jean-Francois.Doussin@lisa.ipsl.fr)

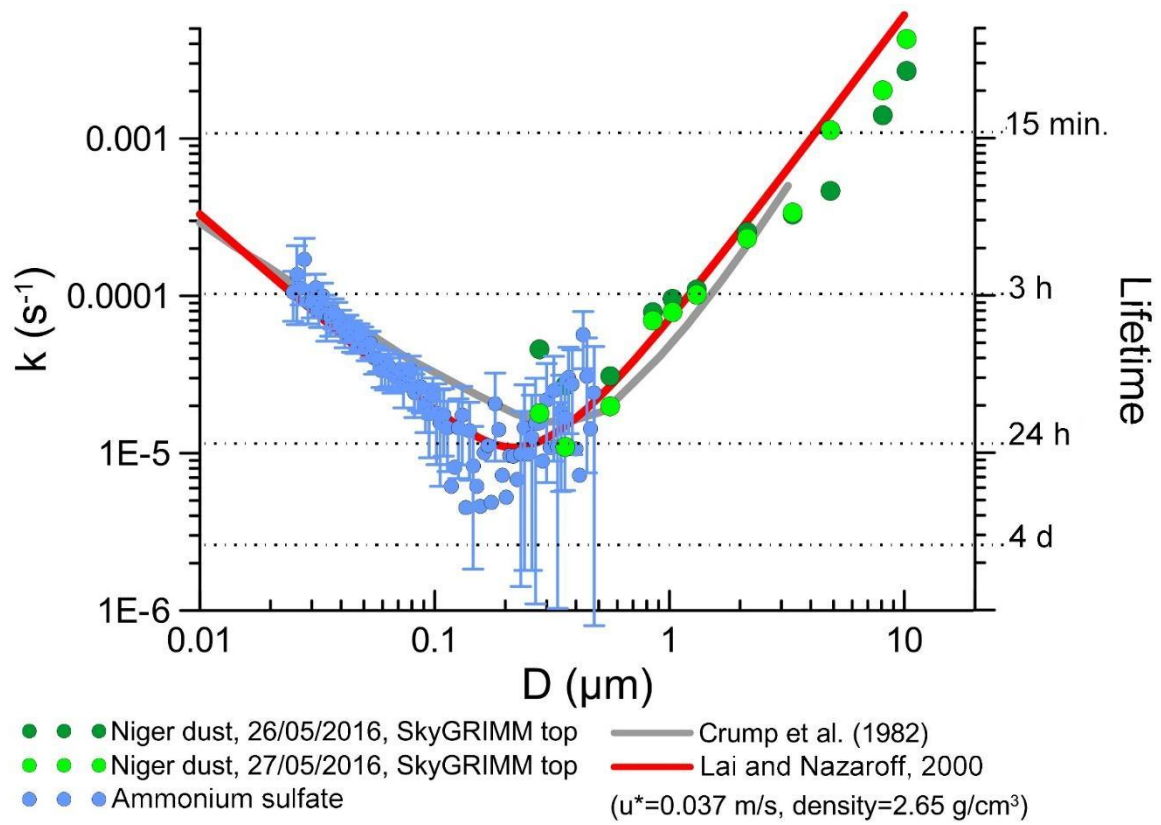

30  
 31  
 32  
 33  
 34  
 35  
 36  
 37  
 38  
 39  
 40  
 41  
 42  
 43  
 44  
 45  
 46  
 47  
 48  
 49  
 50  
 51  
 52  
 53  
 54  
 55  
 56  
 57  
 58  
 59

Figure S1: The lifetime of size-dependent aerosol particles in the CESAM chamber (Lamkaddam thesis 2017)

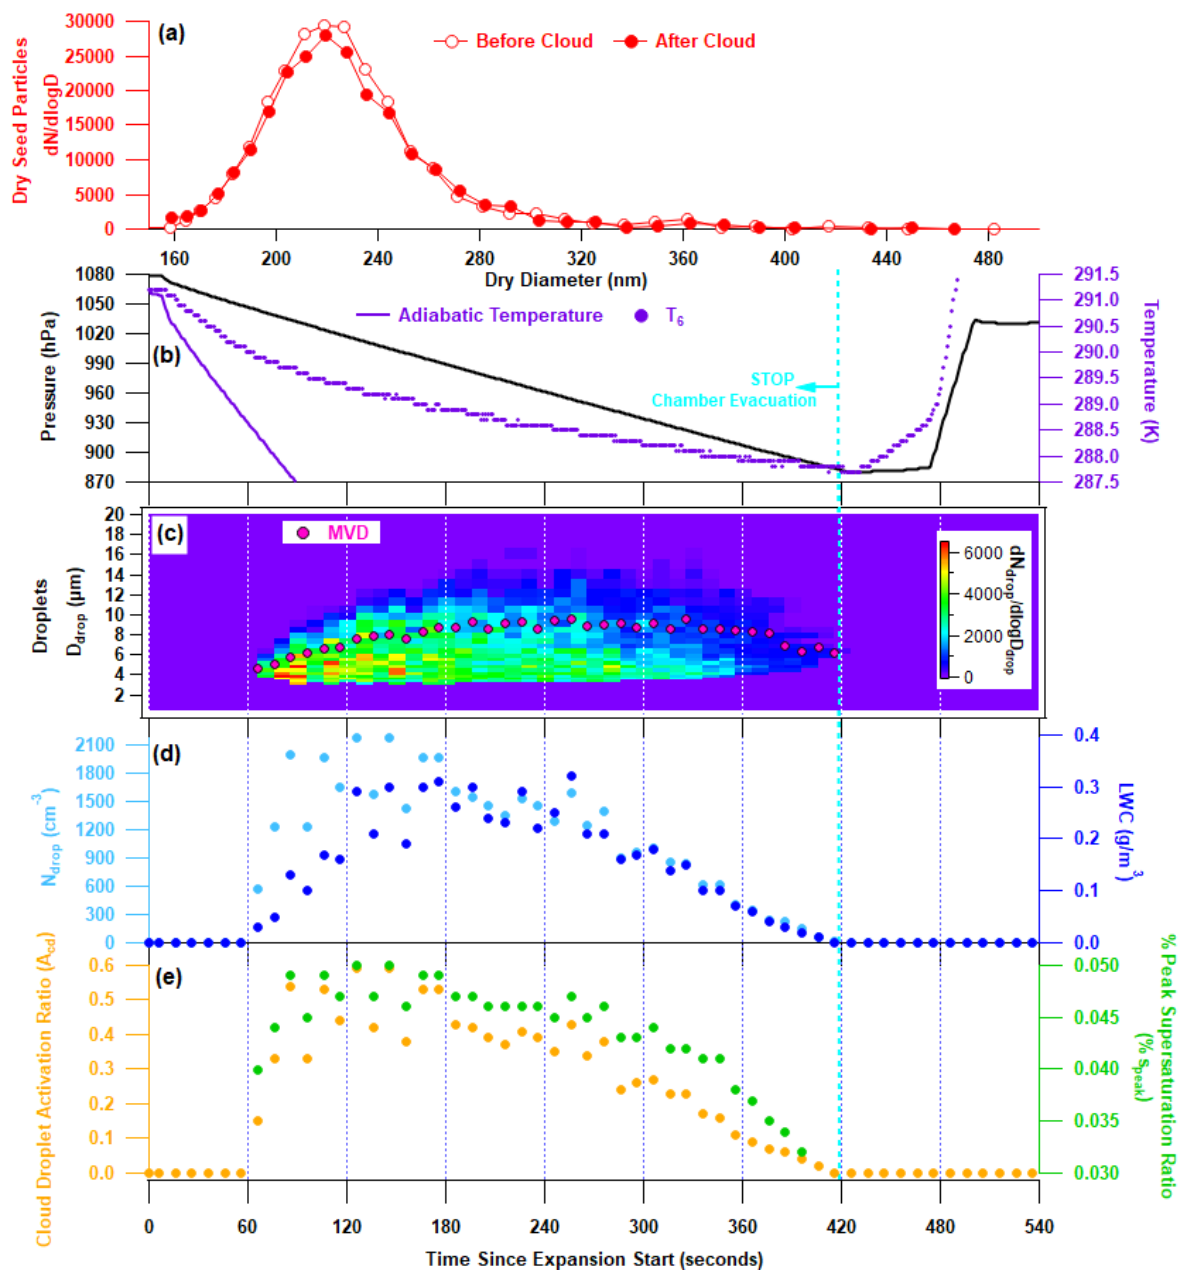

60  
61  
62 **Figure S2: Dark cloud, N-IC-2 performed on 218.7 nm ammonium sulfate seed particles. Panel (a) shows the SMPS size**  
63 **distributions of seed particles obtained before and after the cloud run, followed by the time series of (b) time series of**  
64 **cloud droplets size distribution and volume mean diameter (MVD) measured by welas, (c) time series of cloud droplet**  
65 **concentration ( $N_{drop}$ ) and LWC, and (d) time series of seed particle activation ratio ( $A_{cd}$ ) and chamber peak**  
66 **supersaturation ratio ( $S_{peak}$ ).**  
67  
68  
69  
70  
71  
72  
73  
74  
75

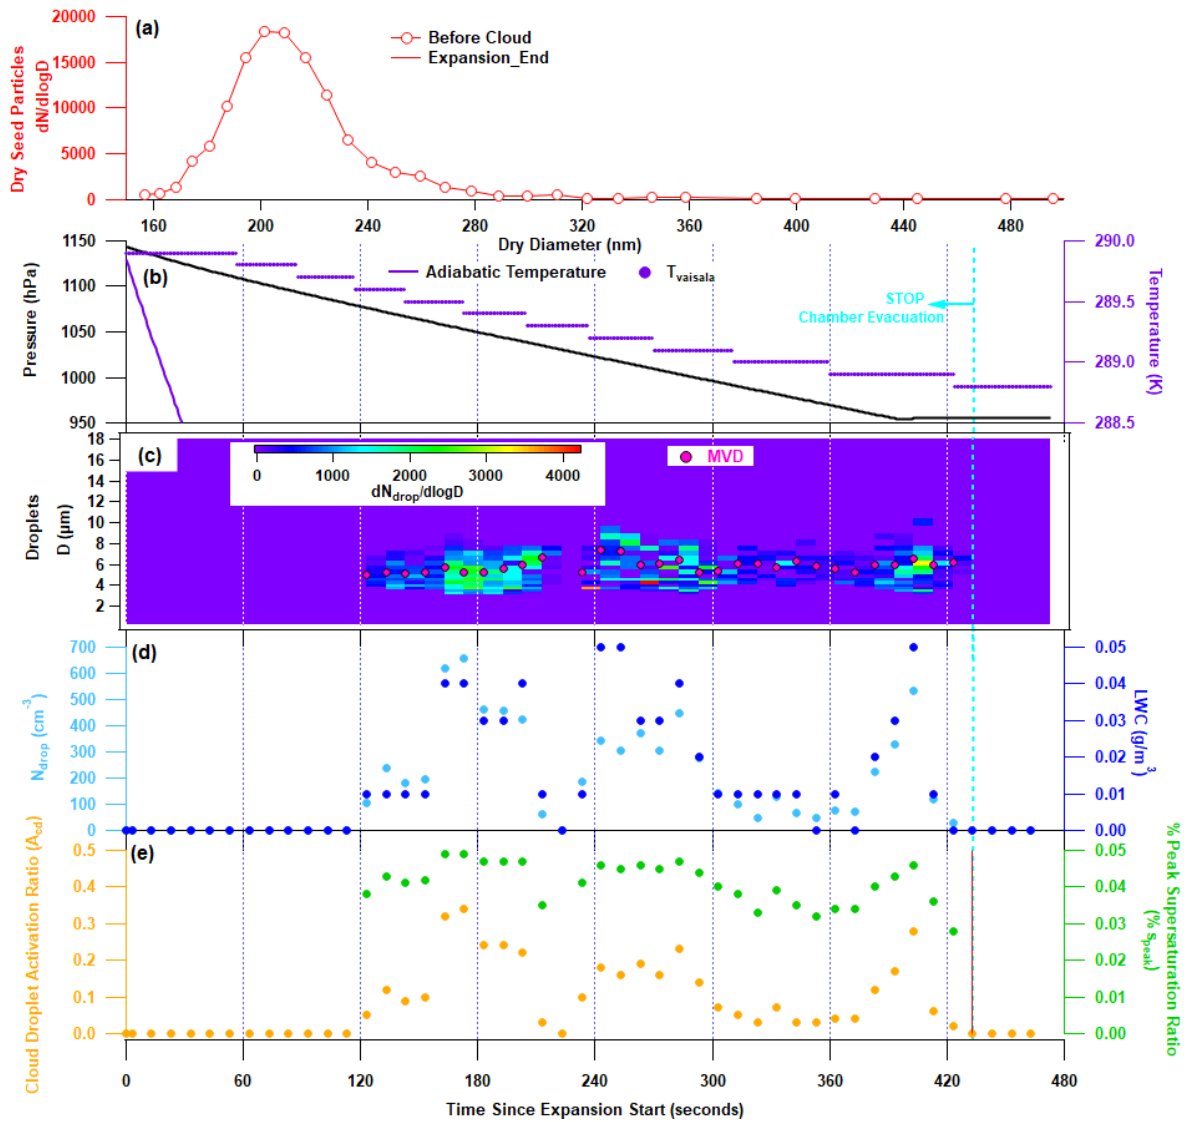

76  
77  
78 **Figure S3: Dark cloud, N-IC-3 performed on 201.7 nm ammonium sulfate seed particles. Panel (a) shows the SMPS size**  
79 **distributions of seed particles obtained before and after the cloud run, followed by the time series of (b) time series of**  
80 **cloud droplets size distribution and volume mean diameter (MVD) measured by welas, (c) time series of cloud droplet**  
81 **concentration ( $N_{\text{drop}}$ ) and LWC, and (d) time series of seed particle activation ratio ( $A_{\text{cd}}$ ) and chamber peak**  
82 **supersaturation ratio ( $S_{\text{peak}}$ ).**

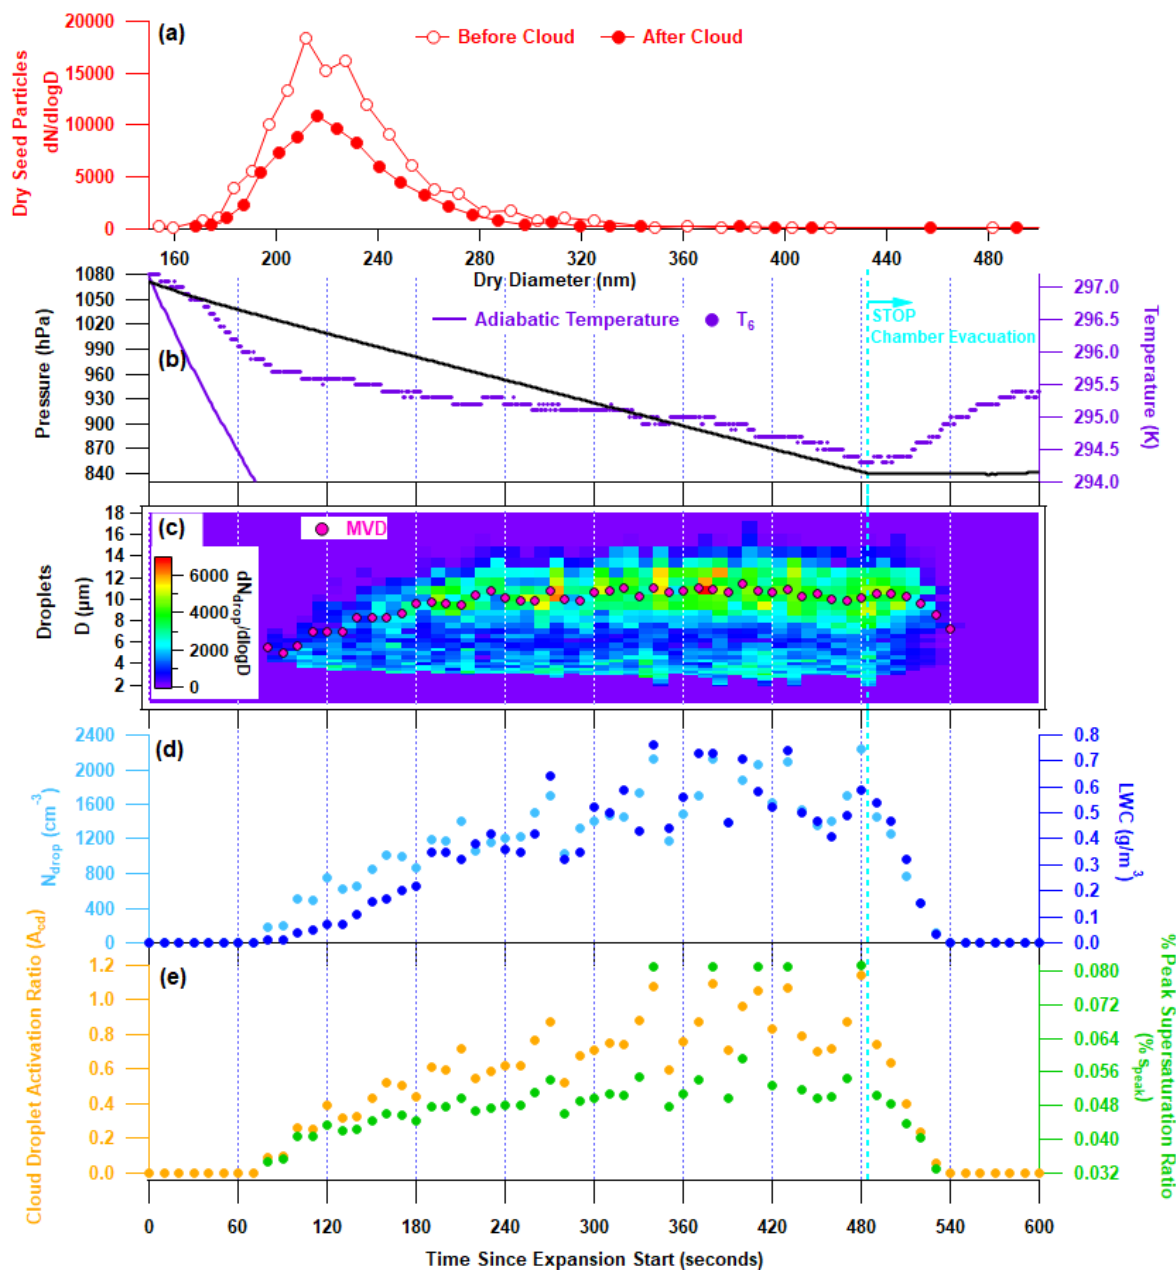

Figure S4: Light cloud, IC-2 performed on 211.7 nm ammonium sulfate seed particles. Panel (a) shows the SMPS size distributions of seed particles obtained before and after the cloud run, followed by the time series of (b) time series of cloud droplets size distribution and volume mean diameter (MVD) measured by welas, (c) time series of cloud droplet concentration ( $N_{\text{droplet}}$ ) and LWC, and (d) time series of seed particle activation ratio ( $A_{\text{cd}}$ ) and chamber peak supersaturation ratio ( $S_{\text{peak}}$ ).

97  
98  
99  
100  
101  
102  
103  
104  
105  
106  
107  
108  
109  
110  
111  
112  
113

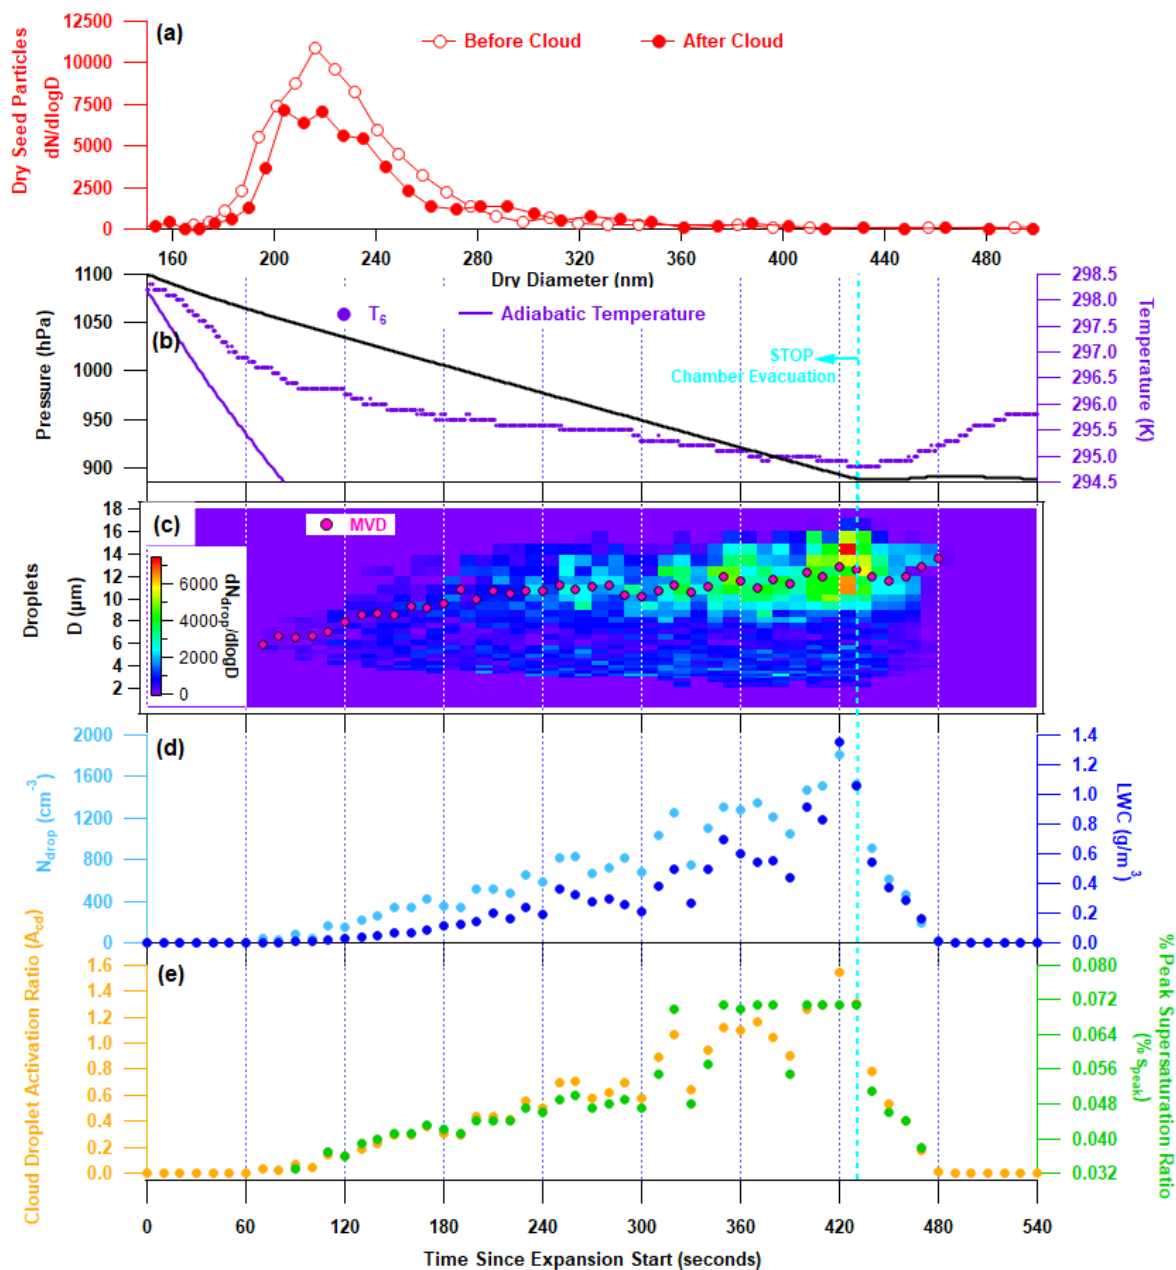

114  
 115  
 116  
 117  
 118  
 119  
 120  
 121  
 122

Figure S5: Light cloud, IC-3 performed on 216 nm ammonium sulfate seed particles. Panel (a) shows the SMPS size distributions of seed particles obtained before and after the cloud run, followed by the time series of (b) time series of cloud droplets size distribution and volume mean diameter (MVD) measured by welas, (c) time series of cloud droplet concentration ( $N_{dropl}$ ) and LWC, and (d) time series of seed particle activation ratio ( $A_{cd}$ ) and chamber peak supersaturation ratio ( $S_{peak}$ ).

123 **References**

124 Lamkaddam, H.: Study in a simulated atmosphere of the formation of Secondary Organic Aerosol resulting from the  
 125 photooxidation of n-dodecane: impact of environmental parameters, Université Paris-Est (2017).

126  
 127
